# Supplementary material for: Direct benefit transfer for nutritional support of patients with TB in India—analysis of national TB program data of 3.7 million patients, 2018–2022
Source: PubMed Central journal article supplement (PMC10811802; doi:10.1186/s12889-024-17777-7), 2024-01-25
Supplement: 12889_2024_17777_MOESM1_ESM.pdf [file 12889_2024_17777_MOESM1_ESM.pdf]

## Additional file 1

**Table S1** Indicators used to calculate TB score of the states

| S.No | Parameter                                                  | Indicator                                                                                       | Score allotted |
|------|------------------------------------------------------------|-------------------------------------------------------------------------------------------------|----------------|
| 1    | Achievement of TB notification among the target identified | % of Target TB notification achieved                                                            | 20             |
| 2    | HIV testing/ screening of TB notified patients             | % of net TB notified patients with known HIV status                                             | 10             |
| 3    | UDST coverage among the TB notified patients               | % of net TB notified patients with UDST done                                                    | 10             |
| 4    | Treatment Success Rate of TB notified patients             | Treatment Success Rate for net TB patients                                                      | 15             |
| 5    | <i>Ni-kshay Poshan Yojana</i> implementation               | % of Eligible beneficiaries paid at least once under <i>Ni-kshay Poshan Yojana</i>              | 10             |
| 6    | DRTB treatment initiation among the diagnosed patients     | % of MDR/ RR patients initiated on treatment out of net diagnosed                               | 15             |
| 7    | Utilisation of the allotted budget                         | % of expenditure amongst ROP                                                                    | 10             |
| 8    | Latent TB infection management                             | % of children <5/<6 years given chemoprophylaxis against the total eligible children identified | 5              |
|      |                                                            | % of PLHIV given IPT against total eligible PLHIV                                               | 5              |

TB – Tuberculosis; HIV – Human Immunodeficiency Virus; UDST – Universal Drug Susceptibility Testing; MDR - Multi-drug resistant; RR - Rifampicin Resistant; ROP - Record of Proceedings; PLHIV - People Living with HIV; IPT - Isoniazid Preventive Therapy

Source: India Tuberculosis report 2022, Central TB Division, Ministry of Health and Family Welfare, Government of India

**Table S2** State wise receipt of at least one *Ni-Kshay Poshan Yojana* instalment among patients with TB in India, 2018-2022 (N =3712551)

| Stratum | States      | 2018<br>n (%) | 2019<br>n (%) | 2020<br>n (%) | 2021<br>n (%) | 2022<br>n (%) | Overall<br>n (%) |
|---------|-------------|---------------|---------------|---------------|---------------|---------------|------------------|
| Low     | Bihar       | 50849 (50.6)  | 76186 (60.7)  | 67825 (66.2)  | 98806 (72.4)  | 112409 (67.4) | 406075 (64.3)    |
|         | Delhi       | 27112 (37.4)  | 42689 (44.6)  | 42173 (55.6)  | 48211 (56.7)  | 55999 (63.3)  | 216184 (51.8)    |
|         | Rajasthan   | 87658 (59.3)  | 106756 (62.3) | 102585 (75.1) | 122173 (80.8) | 135297 (79)   | 554469 (71.2)    |
| Medium  | Tamil Nadu  | 57705 (59.4)  | 83821 (74.9)  | 62408 (86.9)  | 74812 (87.6)  | 83720 (86.8)  | 362466 (78.4)    |
|         | Telangana   | 33301 (65.4)  | 47147 (66.8)  | 45716 (72.8)  | 50594 (82.9)  | 62292 (84.9)  | 239050 (75.0)    |
|         | Uttarakhand | 14780 (72.9)  | 20394 (81.9)  | 17582 (87.0)  | 19243 (80.9)  | 21231 (77.2)  | 93230 (79.9)     |
| High    | Gujarat     | 73444 (52.1)  | 116637 (75.0) | 96838 (81.7)  | 120036 (85.0) | 106910 (72.2) | 513865 (72.9)    |
|         | Meghalaya   | 2935 (65.9)   | 3850 (73.0)   | 3339 (80.8)   | 3026 (71.9)   | 3817 (76.2)   | 16967 (73.5)     |
|         | Odisha      | 41121 (85.1)  | 48786 (92.3)  | 42608 (93.6)  | 49550 (94.7)  | 55698 (92.5)  | 237763 (91.7)    |
| Overall |             | 388905 (56.9) | 546266 (67.1) | 481074 (75.4) | 586451 (79.2) | 637373 (76.1) | 2640069 (71.1)   |

**Table S3** State wise time to receipt of first *Ni-Kshay Poshan Yojana* instalment among patients with TB in India, 2018-2022 (N =3712551)

| Stratum | States      | 2018              | 2019              | 2020              | 2021              | 2022              | Overall           |
|---------|-------------|-------------------|-------------------|-------------------|-------------------|-------------------|-------------------|
|         |             | Median (IQR) days | Median (IQR) days | Median (IQR) days | Median (IQR) days | Median (IQR) days | Median (IQR) days |
| Low     | Bihar       | 202 (115, 342)    | 105 (57, 210)     | 91 (48, 185)      | 144 (67, 304)     | 123 (70, 188)     | 125 (65, 230)     |
|         | Delhi       | 208 (125, 347)    | 161 (91, 281)     | 90 (52, 159)      | 195 (77, 360)     | 119 (73, 177)     | 136 (75, 246)     |
|         | Rajasthan   | 237 (153, 357)    | 195 (91, 387)     | 174 (105, 261)    | 100 (54, 187)     | 80 (50, 115)      | 132 (70, 240)     |
| Medium  | Tamil Nadu  | 191 (112, 300)    | 78 (44, 137)      | 55 (35, 91)       | 48 (31, 76)       | 56 (34, 94)       | 68 (38, 123)      |
|         | Telangana   | 132 (58, 257)     | 89 (29, 203)      | 110 (66, 197)     | 60 (36, 111)      | 61 (36, 103)      | 79 (41, 155)      |
|         | Uttarakhand | 168 (79, 304)     | 71 (33, 152)      | 43 (27, 76)       | 68 (31, 217)      | 190 (119, 261)    | 95 (40, 212)      |
| High    | Gujarat     | 188 (77, 365)     | 90 (48, 168)      | 60 (35, 100)      | 34 (20, 62)       | 139 (81, 209)     | 79 (37, 170)      |
|         | Meghalaya   | 215 (137, 348)    | 113 (64, 201)     | 66 (35, 119)      | 281 (70, 380)     | 114 (72, 166)     | 126 (64, 244)     |
|         | Odisha      | 194 (107, 323)    | 81 (47, 135)      | 45 (29, 75)       | 37 (24, 60)       | 59 (37, 94)       | 63 (35, 122)      |
| Overall |             | 200 (109, 331)    | 105 (54, 213)     | 82 (43, 161)      | 65 (34, 157)      | 91 (51, 149)      | 96 (48, 193)      |

IQR – Interquartile range

**Table S4** Stratum wise time to receipt of first *Ni-Kshay Poshan Yojana* instalment among patients with TB in India, 2018-2022 (N =3712551)

| Variable          | Category             | Total<br>N (%) | Receipt of at least<br>one NPY instalment<br>n (%) | Time to receipt of first NPY instalment (in days)<br>Median (IQR) |                   |                    |                 |
|-------------------|----------------------|----------------|----------------------------------------------------|-------------------------------------------------------------------|-------------------|--------------------|-----------------|
|                   |                      |                |                                                    | Overall                                                           | Low TB Score      | Medium TB<br>Score | High TB Score   |
| Overall           |                      | 3712551        | 2640069 (71.1)                                     | 96 (48, 193)                                                      | 130 (69, 238)     | 74 (39, 145)       | 74 (36, 157)    |
| Notified year     | 2018                 | 683074 (18.4)  | 388905 (56.9)                                      | 200 (109, 331)                                                    | 223 (135, 352)    | 172 (89, 286)      | 191 (91, 347)   |
|                   | 2019                 | 813643 (21.9)  | 546266 (67.1)                                      | 105 (54, 213)                                                     | 151 (76, 302)     | 79 (39, 158)       | 87 (48, 158)    |
|                   | 2020                 | 637793 (17.2)  | 481074 (75.4)                                      | 82 (43, 161)                                                      | 128 (67, 226)     | 68 (39, 123)       | 55 (32, 93)     |
|                   | 2021                 | 740734 (20.0)  | 586451 (79.2)                                      | 65 (34, 157)                                                      | 124 (61, 254)     | 54 (33, 93)        | 35 (21, 63)     |
|                   | 2022                 | 837307 (22.6)  | 637373 (76.1)                                      | 91 (51, 149)                                                      | 98 (59, 153)      | 66 (37, 112)       | 101 (58, 177)   |
| Age (in Years)    | Below 15             | 228045 (6.1)   | 152307 (66.8)                                      | 111 (56, 213)                                                     | 136 (73, 244)     | 78 (42, 153)       | 80 (40, 166)    |
|                   | 15 – 59              | 2862414 (77.1) | 2045350 (71.5)                                     | 97 (48, 194)                                                      | 131 (70, 239)     | 74 (39, 146)       | 75 (37, 158)    |
|                   | 60 and above         | 622035 (16.8)  | 442377 (71.1)                                      | 89 (45, 180)                                                      | 123 (65, 226)     | 71 (38, 138)       | 70 (35, 148)    |
| Gender            | Female               | 1359926 (36.6) | 978225 (71.9)                                      | 98 (49, 195)                                                      | 131 (70, 237)     | 74 (39, 146)       | 74 (37, 155)    |
|                   | Male                 | 2349504 (63.3) | 1660109 (70.7)                                     | 95 (48, 192)                                                      | 130 (69, 238)     | 74 (39, 144)       | 74 (36, 157)    |
|                   | Transgender          | 2284 (0.1)     | 1460 (64.0)                                        | 98.5 (53, 190)                                                    | 122 (69.5, 227.5) | 77 (39, 137)       | 91 (44, 190)    |
| Notifying Sector  | Public               | 2710721 (73.0) | 2124808 (78.4)                                     | 93 (47, 187)                                                      | 127 (69, 233)     | 71 (38, 140)       | 72 (36, 154)    |
|                   | Private              | 1001829 (27.0) | 515260 (51.4)                                      | 113 (56, 218)                                                     | 140 (71, 253)     | 89 (47, 172)       | 84 (41, 171)    |
| Site of Disease   | Extra Pulmonary      | 825605 (23.2)  | 628239 (76.1)                                      | 96 (49, 188)                                                      | 132 (71, 234)     | 75 (41, 142)       | 72 (37, 147)    |
|                   | Pulmonary            | 2726671 (76.8) | 2001515 (73.4)                                     | 96 (48, 194)                                                      | 130 (69, 238)     | 74 (39, 146)       | 75 (36, 160)    |
| Drug Type         | DSTB                 | 3610266 (97.2) | 2559307 (70.9)                                     | 96 (48, 191)                                                      | 129 (69, 236)     | 73 (39, 144)       | 73 (36, 155)    |
|                   | DRTB                 | 102285 (2.8)   | 80762 (79.0)                                       | 127 (65, 262)                                                     | 168 (88, 318)     | 94 (51, 184)       | 107 (53, 228)   |
| HIV status        | Non-Reactive         | 3089052 (83.2) | 2382703 (77.1)                                     | 91 (46, 182)                                                      | 123 (67, 226)     | 70 (38, 135)       | 72 (36, 150)    |
|                   | Reactive             | 65771 (1.8)    | 44479 (67.6)                                       | 92 (48, 187)                                                      | 146 (76, 258)     | 76 (42, 140)       | 89 (43, 186)    |
|                   | Don't Know / Missing | 557728 (15.0)  | 212887 (38.2)                                      | 180 (93, 313)                                                     | 196 (106, 332)    | 147 (73, 264)      | 167 (79, 316)   |
| Diabetic          | Yes                  | 217879 (5.9)   | 184561 (84.7)                                      | 70 (38, 134)                                                      | 116 (63, 214)     | 59 (35, 107)       | 60 (31, 121)    |
|                   | No                   | 2602310 (70.1) | 2044964 (78.6)                                     | 91 (46, 179)                                                      | 122 (66, 222)     | 70 (38, 130)       | 71 (36, 148)    |
|                   | Don't know / Missing | 892362 (24.0)  | 410544 (46.0)                                      | 159 (77, 288)                                                     | 176 (92, 307)     | 124 (55, 244)      | 163 (77, 313.5) |
| Treatment Outcome | Unfavourable         | 583173 (16.1)  | 239041 (41.0)                                      | 94 (47, 194)                                                      | 129 (67, 243)     | 70 (38, 136)       | 73 (35, 159)    |
|                   | Favourable           | 3032141 (83.9) | 2338971 (77.1)                                     | 97 (48, 195)                                                      | 132 (70, 240)     | 74 (39, 147)       | 74 (36, 158)    |

NPY - *Ni-Kshay Poshan Yojana*; TB-Tuberculosis; IQR – Interquartile range; DRTB- Drug resistant TB; DSTB-Drug sensitive TB; HIV – Human Immunodeficiency Virus

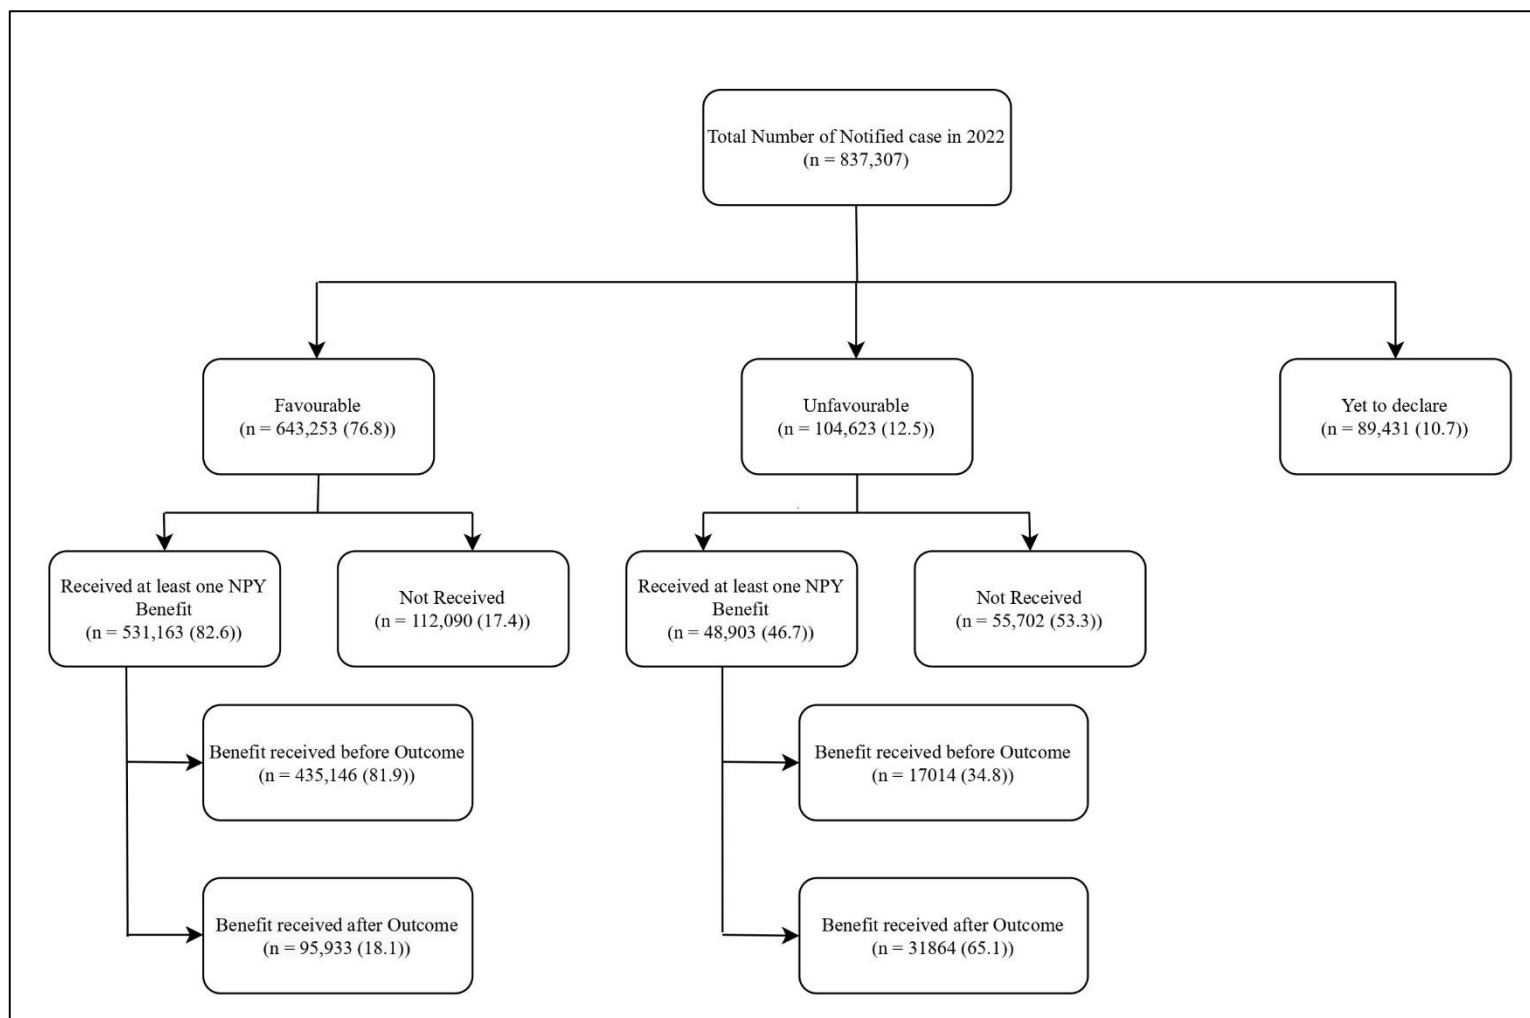

**Figure S1** Flow chart describing proportion of patients with TB who had received at least one *Ni-Kshay Poshan Yojana* instalment by treatment outcome, 2022 (N=837307)  
Abbreviation: NPY, *Ni-Kshay Poshan Yojana*

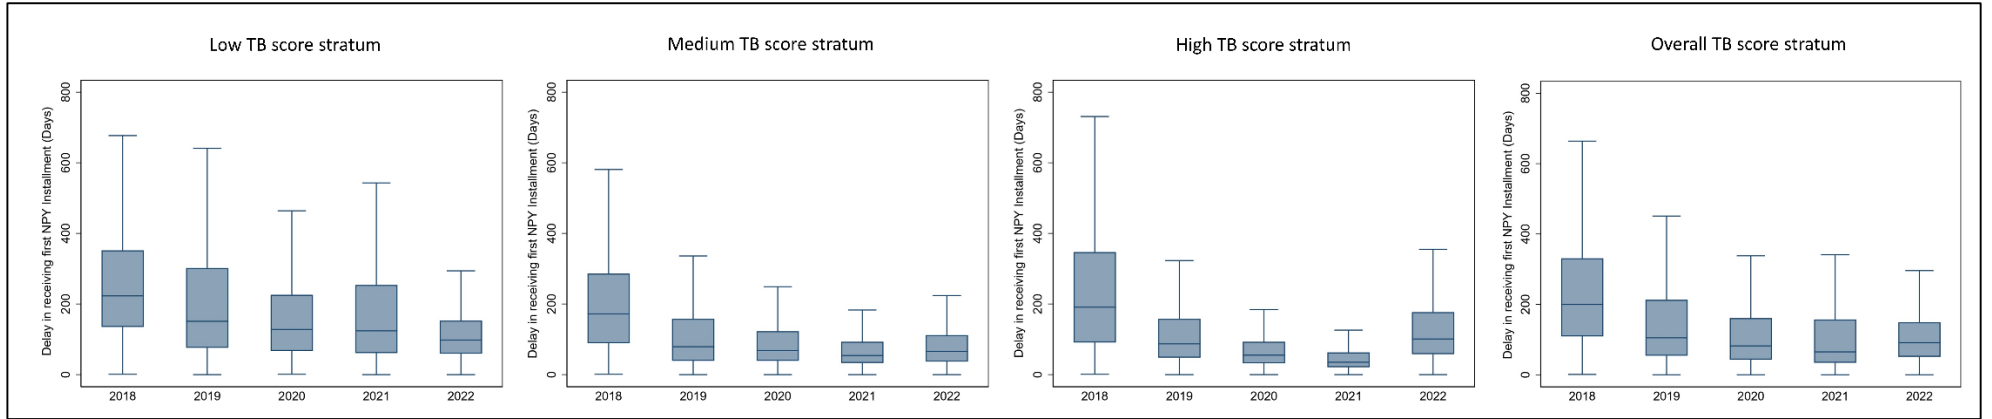

**Figure S2** Stratum wise time to receipt of first *Ni-Kshay Poshan Yojana* instalment among patients with TB in India, 2018-2022 (N =3712551)
